# Supplementary material for: Developing Integrated Strategies to Address Emerging Weed Management Challenges in Christmas Tree Production
Source: MDPI journal article supplement (doi:10.3390/f14050881), 2023-04-25
Supplement: s1 [file s1]

**Table S2** Mean weed control (% ground cover) 60 days after treatment (DAT) of plots treated with three herbicides and organic mulch (Table 5), alone or in combination, at Christmas tree farms in Michigan.

| Treatment                             | Location/ Tree species |                      |                       |                      |                       |
|---------------------------------------|------------------------|----------------------|-----------------------|----------------------|-----------------------|
|                                       | Allegan<br>White pine  | Horton<br>Fraser fir | Sidney<br>Blue spruce | Sidney Fraser<br>fir | Gobles<br>Scotch pine |
| Clopyralid                            | 9.25 bc*               | 6.1 cd               | 61.51 a               | 25.51 bcde           | 8.32 bc               |
| Glyphosate                            | 39.92 abc              | 16.15 cd             | 58.62 a               | 13.1 cde             | 63.68 ab              |
| Oxyfluorfen                           | 55.04 ab               | 23.03 cd             | 65.81 a               | 10.69 de             | 54.76 ab              |
| Oxyfluorfen + Glyphosate              | 16.92 abc              | 76.13 ab             | 41.19 a               | 64.02 abc            | 49.84 ab              |
| Clopyralid + Oxyfluorfen              | 68.20 ab               | 81.42 ab             | 41.31 a               | 60.12 abcd           | 52.63 ab              |
| Clopyralid + Glyphosate               | 20.62 abc              | 33.32 bc             | 50 a                  | 71.43 ab             | 42.57 ab              |
| Mulch                                 | 36.56 abc              | 47.35 abc            | 83.08 a               | 2.41 e               | 87.77 a               |
| Mulch + Oxyfluorfen + Glyphosate      | 79.14 a                | 82.57 ab             | 89.30 a               | 79.1 ab              | 92.69 a               |
| Mulch + Clopyralid + Oxyfluorfen      | 79.14 a                | 87.71 a              | 93.89 a               | 87.02 a              | 93.89 a               |
| Mulch + Clopyralid + Glyphosate       | 63.92 ab               | 82.68 ab             | 92.79 a               | 65.37 abc            | 91.26 a               |
| Clopyralid + Oxyfluorfen + Glyphosate | 79.13 a                | 44.37 abc            | 91.27 a               | 66.21 a              | 78.35 ab              |
| Control                               | 0 c                    | 0 d                  | 0 b                   | 0 e                  | 0 c                   |

\* Means within a column followed by the same letter are not significantly different and  $p < 0.05$  level. Mean separation by Tukey's HSD test.

**Table S3** Mean weed control (% ground cover) 30 days after treatment (DAT) of plots treated with three herbicides and organic mulch (Table 5), alone or in combination, at Christmas tree farms in Michigan.

| Treatment                             | Location/ Tree species |                      |                       |                      |                       |
|---------------------------------------|------------------------|----------------------|-----------------------|----------------------|-----------------------|
|                                       | Allegan<br>White pine  | Horton<br>Fraser fir | Sidney<br>Blue spruce | Sidney Fraser<br>fir | Gobles<br>Scotch pine |
| Clopyralid                            | 6.25 bc                | 9.73 de**            | 41.76 b**             | 33.77 bc**           | 81.22 a**             |
| Glyphosate                            | 38.88 abc              | 23.72 cde            | 78.79 ab              | 17.56 cd             | 87.77 a               |
| Oxyfluorfen                           | 76.75 a                | 26.22 cde            | 90.74 ab              | 36.86 bc             | 76.57 a               |
| Oxyfluorfen + Glyphosate              | 57.63 ab               | 74.91 abc            | 71.43 ab              | 60.00 abc            | 57.2 a                |
| Clopyralid + Oxyfluorfen              | 84.54 a                | 89.15 a              | 79.73 ab              | 80.12 ab             | 78.16 a               |
| Clopyralid + Glyphosate               | 49.08 ab               | 72.26 abc            | 87.54 ab              | 73.78 ab             | 82.75 a               |
| Mulch                                 | 31.07 abc              | 36.08 bcd            | 83.92 ab              | 17.9 dc              | 90.08 a               |
| Mulch + Oxyfluorfen + Glyphosate      | 80.52 a                | 88.99 a              | 88.24ab               | 82.57 ab             | 93.89 a               |
| Mulch + Clopyralid + Oxyfluorfen      | 94.24 a                | 89.61 a              | 88.48 ab              | 92.69 a              | 97.95 a               |
| Mulch + Clopyralid + Glyphosate       | 63.34 ab               | 85.99 ab             | 99.01 a               | 87.02 ab             | 92.37 a               |
| Clopyralid + Oxyfluorfen + Glyphosate | 79.13 a                | 66.21 ab             | 95.88 a               | 69.49 ab             | 95.35 a               |
| Control                               | 0 c                    | 0 e                  | 0 c                   | 0 d                  | 0 b                   |

\*\* Means within a column followed by the same letter are not significantly different and  $p < 0.05$  level. Mean separation by Tukey's HSD test.

**Table S4** Weed control Summary Analysis of Variance (F values) for weed control of factorial combinations of three herbicides and contrast of herbicides treatments with and without mulch. Analyses based on assessments conducted 60 days after treatment (DAT).

| Effect                                          | Location/ Tree species |                      |                       |                      |                       |
|-------------------------------------------------|------------------------|----------------------|-----------------------|----------------------|-----------------------|
|                                                 | Allegan<br>White pine  | Horton<br>Fraser fir | Sidney<br>Blue spruce | Sidney Fraser<br>fir | Gobles<br>Scotch pine |
| Clopyralid (Clo)                                | 1.05                   | 17.56***             | 2.3                   | 33.29**              | 0                     |
| Glyphosate (Gly)                                | 0.13                   | 23.4***              | 2.06                  | 25.4***              | 4.28*                 |
| Oxyfluorfen (Oxy)                               | 8.04**                 | 76.12***             | 1.92                  | 16.62***             | 4.43*                 |
| Clo × Gly                                       | 0.44                   | 2.27                 | 0.8                   | 0.78                 | 1.02                  |
| Clo × Oxy                                       | 0.42                   | 1.56                 | 2.24                  | 1.93                 | 0.11                  |
| Gly × Oxy                                       | 8.13**                 | 0.06                 | 2.03                  | 0.03                 | 7.07*                 |
| Clo × Gly × Oxy                                 | 1.71                   | 1.42                 | 7.66                  | 2.37                 | 0.59                  |
| Contrast:<br>Combinations with mulch vs without | 4.19*                  | 6.88*                | 11.57**               | 1.27                 | 5.52*                 |

Note \*  $p \leq 0.05$ ; \*\*  $P < 0.01$ ; \*\*\*  $p < 0.001$ .

**Table S5** Weed control Summary Analysis of Variance (F values) for weed control of factorial combinations of three herbicides and contrast of herbicides treatments with and without mulch. Analyses based on assessments conducted 30 days after treatment (DAT).

| Effect                                             | Location/ Tree species |                      |                       |                      |                       |
|----------------------------------------------------|------------------------|----------------------|-----------------------|----------------------|-----------------------|
|                                                    | Allegan<br>White pine  | Horton<br>Fraser fir | Sidney<br>Blue spruce | Sidney Fraser<br>fir | Gobles<br>Scotch pine |
| Clopyralid (Clo)                                   | 1.93                   | 35.43***             | 2.27                  | 29.69***             | 28.76***              |
| Glyphosate (Gly)                                   | 3.93                   | 35.62***             | 8.66**                | 11.32**              | 18.45***              |
| Oxyfluorfen (Oxy)                                  | 35.96***               | 57.32***             | 10.52**               | 23.67***             | 7.18*                 |
| Clo × Gly                                          | 0.17                   | 0.37                 | 1.1                   | 0                    | 12.91**               |
| Clo × Oxy                                          | 0.18                   | 0.39                 | 5.57*                 | 0.57                 | 8.34**                |
| Gly × Oxy                                          | 17.14***               | 3.36                 | 22.27***              | 0.97                 | 28.96***              |
| Clo × Gly × Oxy                                    | 0.13                   | 3.36                 | 2.88                  | 0.01                 | 33.3***               |
| Contrast:<br>Combinations with mulch vs<br>without | 0.25                   | 2.79                 | 1.24                  | 3.67                 | 12.55**               |

Note \*  $p \leq 0.05$ ; \*\*  $P < 0.01$ ; \*\*\*  $p < 0.001$ .

**Table S6** Mean phytotoxicity percent 60 days after treatment (DAT) of plots treated with three herbicides and organic mulch (Table 1), alone or in combination, at Christmas tree farms in Michigan.

| Treatment                             | Location/ Tree species |                      |                       |                      |                       |
|---------------------------------------|------------------------|----------------------|-----------------------|----------------------|-----------------------|
|                                       | Allegan<br>White pine  | Horton<br>Fraser fir | Sidney<br>Blue spruce | Sidney Fraser<br>fir | Gobles<br>Scotch pine |
| Clopyralid                            | 8.60 a*                | 9.53 ab              | 0 ab                  | 4.12 bc              | 0a                    |
| Glyphosate                            | 7.20 a                 | 11.93 ab             | 3.20 ab               | 11.31 ab             | 2.94 a                |
| Oxyfluorfen                           | 9.25 a                 | 4.26 ab              | 16.07 ab              | 8.60 ab              | 2.83 a                |
| Oxyfluorfen + Glyphosate              | 8.60 a                 | 34.79 a              | 1.86 ab               | 11.13 ab             | 0.318 a               |
| Clopyralid + Oxyfluorfen              | 8.32 a                 | 7.91 ab              | 2.94 ab               | 4.64 bc              | 5.14 a                |
| Clopyralid + Glyphosate               | 4.99 a                 | 16.23 ab             | 8.49 ab               | 22.24 a              | 5.48 a                |
| Mulch                                 | 0 b                    | 0 b                  | 0 b                   | 0 c                  | 0a                    |
| Mulch + Oxyfluorfen + Glyphosate      | 11.04 a                | 7.23 ab              | 0.65 ab               | 18.70 ab             | 0.65 a                |
| Mulch + Clopyralid + Oxyfluorfen      | 9.25 a                 | 7.47 ab              | 1.86 ab               | 6.77 ab              | 1.27 a                |
| Mulch + Clopyralid + Glyphosate       | 4.99 a                 | 22.65 a              | 36.18 a               | 22.24 a              | 3.68 a                |
| Clopyralid + Oxyfluorfen + Glyphosate | 4.12 a                 | 32.72 a              | 2.27 ab               | 21.07 a              | 4.56 a                |
| Control                               | 0 b                    | 0 b                  | 0 b                   | 0 c                  | 0a                    |

\* Means within a column followed by the same letter are not significantly different and  $p < 0.05$  level. Mean separation by Tukey's HSD test.

**Table S7** Mean phytotoxicity percent 90 days after treatment (DAT) of plots treated with three herbicides and organic mulch (Table 5), alone or in combination, at Christmas tree farms in Michigan.

| Treatment                             | Location/ Tree species |                      |                       |                      |                       |
|---------------------------------------|------------------------|----------------------|-----------------------|----------------------|-----------------------|
|                                       | Allegan<br>White pine  | Horton<br>Fraser fir | Sidney<br>Blue spruce | Sidney Fraser<br>fir | Gobles<br>Scotch pine |
| Clopyralid                            | 0a*                    | 7.04 abc             | 0 a                   | 0.31 bc              | 0 c                   |
| Glyphosate                            | 1.26 a                 | 6.25 abc             | 1.27 a                | 17.10 a              | 0.32 bc               |
| Oxyfluorfen                           | 1.26 a                 | 6.10 abc             | 6.49 a                | 6.10 abc             | 1.26 abc              |
| Oxyfluorfen + Glyphosate              | 3.68 a                 | 13.49 ab             | 2.94 a                | 11.31 ab             | 0 c                   |
| Clopyralid + Oxyfluorfen              | 1.85 a                 | 3.69 bc              | 4.65 a                | 8.31 abc             | 0.31 bc               |
| Clopyralid + Glyphosate               | 1.26 a                 | 13.49 ab             | 2.83 a                | 14.35 a              | 0 c                   |
| Mulch                                 | 0a                     | 0 c                  | 0 a                   | 0 c                  | 0 c                   |
| Mulch + Oxyfluorfen + Glyphosate      | 2.41 a                 | 7.04 abc             | 1.27 a                | 11.89 ab             | 0.32 bc               |
| Mulch + Clopyralid + Oxyfluorfen      | 1.26 a                 | 6.37 abc             | 1.51 a                | 4.99 abc             | 1.26 abc              |
| Mulch + Clopyralid + Glyphosate       | 0.31 a                 | 19.95 ab             | 23.71 a               | 9.58 ab              | 11.00 ab              |
| Clopyralid + Oxyfluorfen + Glyphosate | 0.31 a                 | 25.89 a              | 0 a                   | 9.98 ab              | 15.69 ab              |
| Control                               | 0a                     | 0 c                  | 0 a                   | 0 c                  | 0 c                   |

\* Means within a column followed by the same letter are not significantly different and  $p < 0.05$  level. Mean separation by Tukey's HSD test.

**Table S8** Phytotoxicity Summary Analysis of Variance (F values) for phytotoxicity of factorial combinations of three herbicides and contrast of herbicides treatments with and without mulch. Analyses based on assessments conducted 60 days after treatment (DAT).

| Effect                                             | Location/ Tree species |                      |                       |                      |                       |
|----------------------------------------------------|------------------------|----------------------|-----------------------|----------------------|-----------------------|
|                                                    | Allegan<br>White pine  | Horton<br>Fraser fir | Sidney<br>Blue spruce | Sidney Fraser<br>fir | Gobles<br>Scotch pine |
| Clopyralid (Clo)                                   | 2.09                   | 1.98                 | 0.13                  | 4.13                 | 1.85                  |
| Glyphosate (Gly)                                   | 1.04                   | 15.31***             | 0.34                  | 24.76***             | 1.85                  |
| Oxyfluorfen (Oxy)                                  | 9.93**                 | 4.51*                | 1.7                   | 2.68                 | 1.58                  |
| Clo × Gly                                          | 18.38***               | 1.31                 | 1.48                  | 0.54                 | 0.62                  |
| Clo × Oxy                                          | 13.55**                | 1.09                 | 1.25                  | 2.73                 | 0.55                  |
| Gly × Oxy                                          | 9.29**                 | 0.92                 | 6.42*                 | 2.58                 | 6.64*                 |
| Clo × Gly × Oxy                                    | 7.43*                  | 0.25                 | 0.21                  | 1.76                 | 0.03                  |
| Contrast:<br>Combinations with mulch vs<br>without | 0.28                   | 0.04                 | 0.74                  | 5.17*                | 0.04                  |

Note \*  $p \leq 0.05$ ; \*\*  $P < 0.01$ ; \*\*\*  $p < 0.001$ .

**Table S9** Phytotoxicity Summary Analysis of Variance (F values) for phytotoxicity of factorial combinations of three herbicides and contrast of herbicides treatments with and without mulch. Analyses based on assessments conducted 90 days after treatment (DAT).

| Effect                                          | Location/ Tree species |                      |                       |                      |                       |
|-------------------------------------------------|------------------------|----------------------|-----------------------|----------------------|-----------------------|
|                                                 | Allegan<br>White pine  | Horton<br>Fraser fir | Sidney<br>Blue spruce | Sidney Fraser<br>fir | Gobles<br>Scotch pine |
| Clopyralid (Clo)                                | 0.47                   | 11.24**              | 0.57                  | 0.05                 | 4.26*                 |
| Glyphosate (Gly)                                | 1.87                   | 31.65***             | 0.01                  | 23.13***             | 4.26*                 |
| Oxyfluorfen (Oxy)                               | 2.75                   | 9.58**               | 3.09                  | 3.38                 | 13.28**               |
| Clo × Gly                                       | 0.95                   | 0.22                 | 0.13                  | 0.72                 | 8.14**                |
| Clo × Oxy                                       | 0.47                   | 3.9                  | 1.67                  | 0                    | 8.14**                |
| Gly × Oxy                                       | 1.87                   | 0.53                 | 7.9**                 | 11.89**              | 1.62                  |
| Clo × Gly × Oxy                                 | 0.95                   | 5.96**               | 0.82                  | 0.03                 | 13.28**               |
| Contrast:<br>Combinations with mulch vs without | 1.38                   | 5.1*                 | 0.04                  | 0.05                 | 24.76***              |

Note \*  $p \leq 0.05$ ; \*\*  $P < 0.01$ ; \*\*\*  $p < 0.001$ .
